# Supplementary material
Source: PubMed Central journal article supplement (PMC3613902)
Supplement: JCI60415sd.pdf [file JCI60415sd.pdf]

**A**

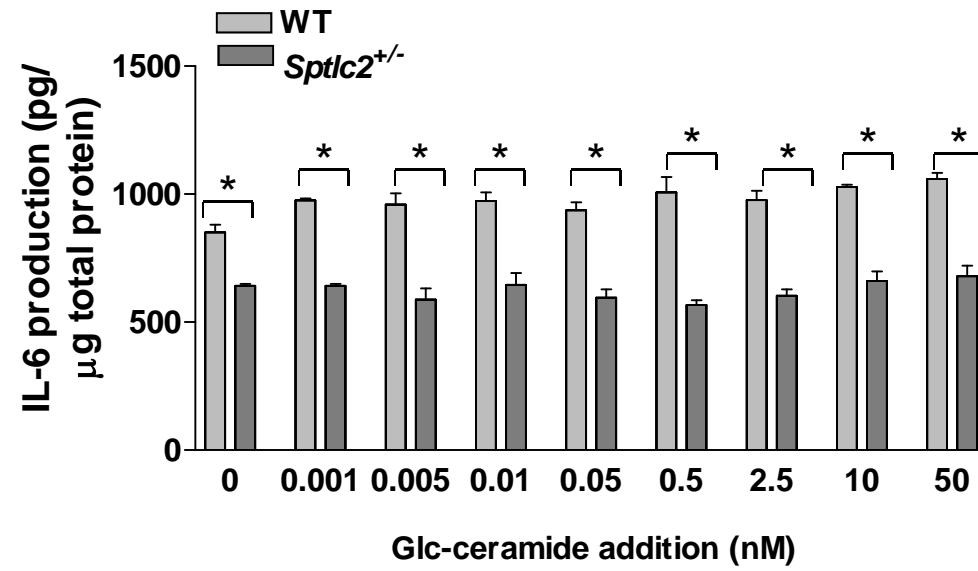

**B**

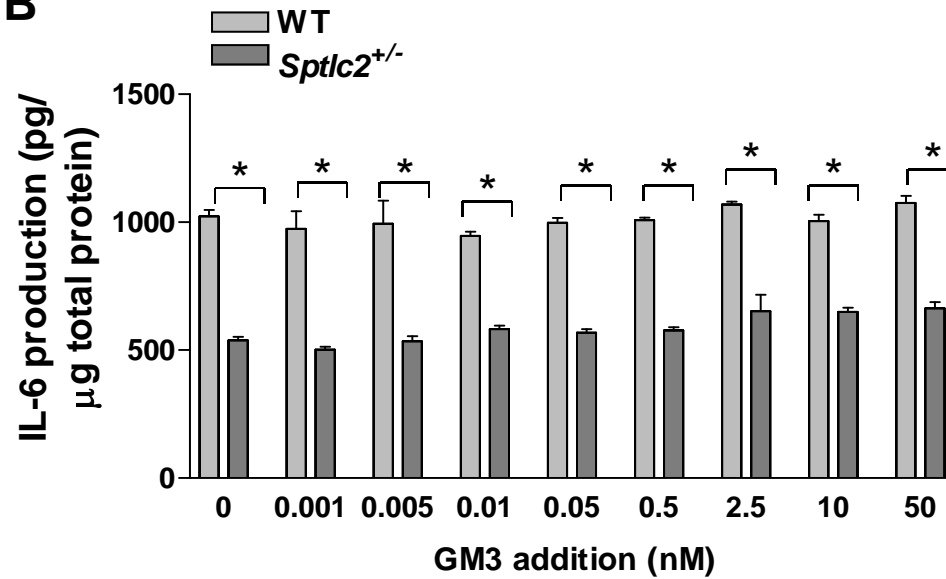

**A**

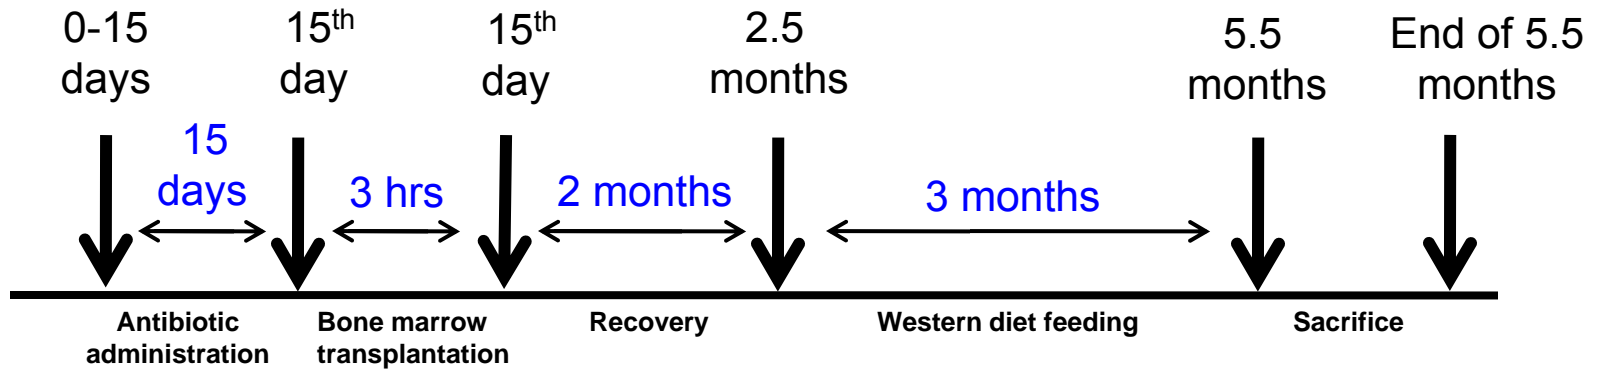

**B**

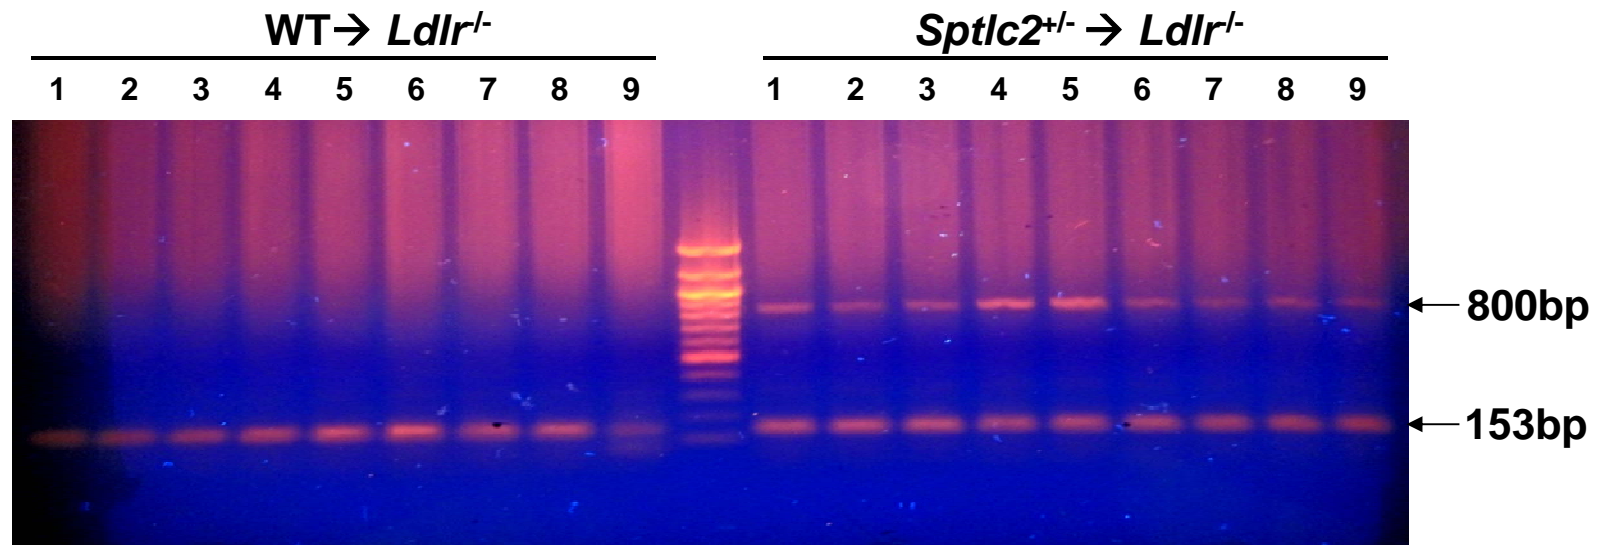

Supplemental Fig.3. Chakraborty et al.

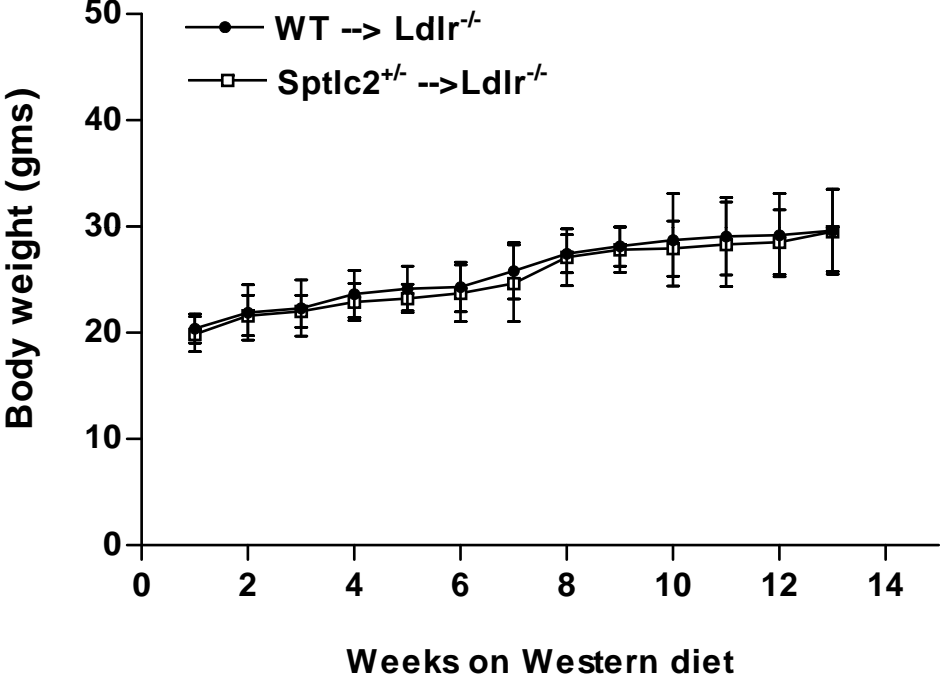

**A**

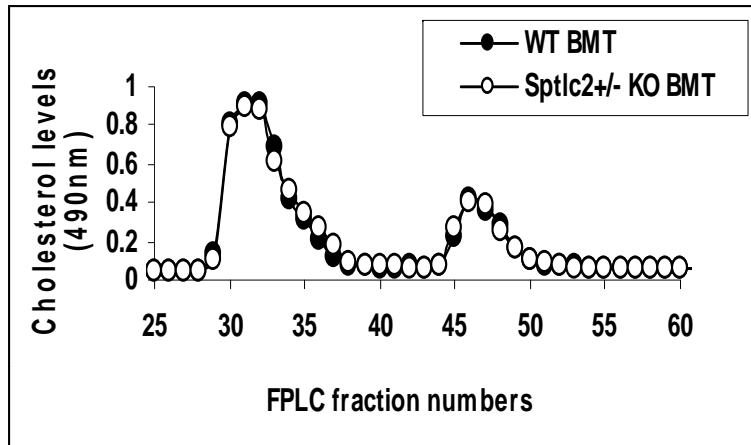

**B**

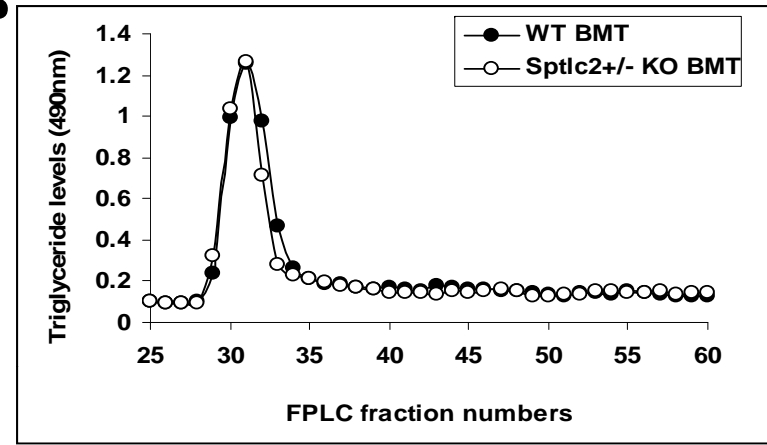

**C**

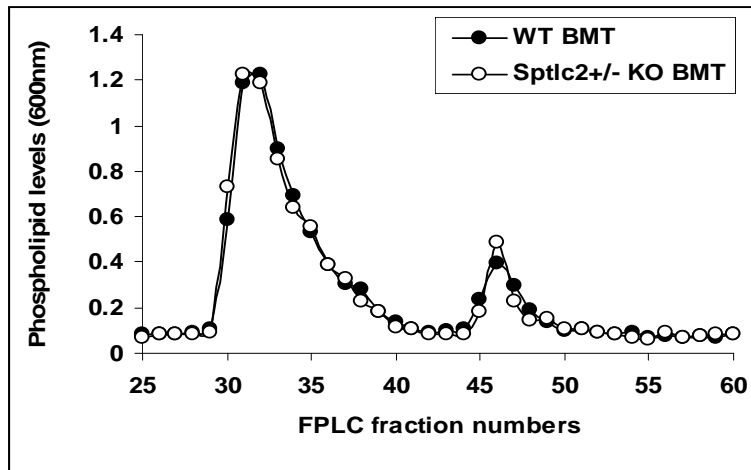

**D**

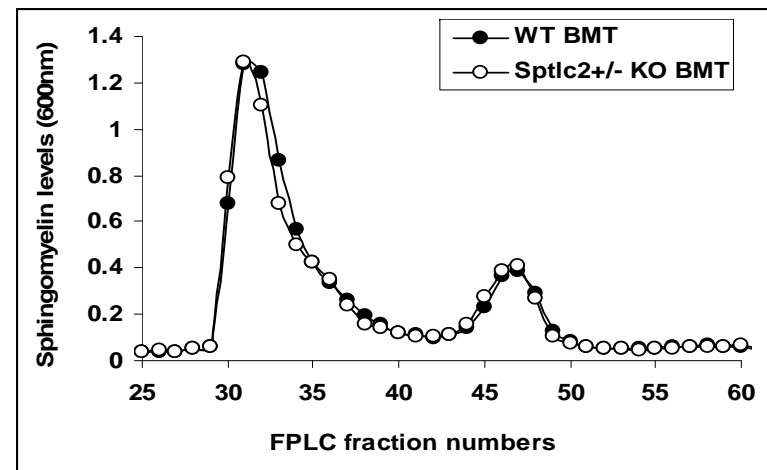

Supplemental Fig.5. Chakraborty et al.

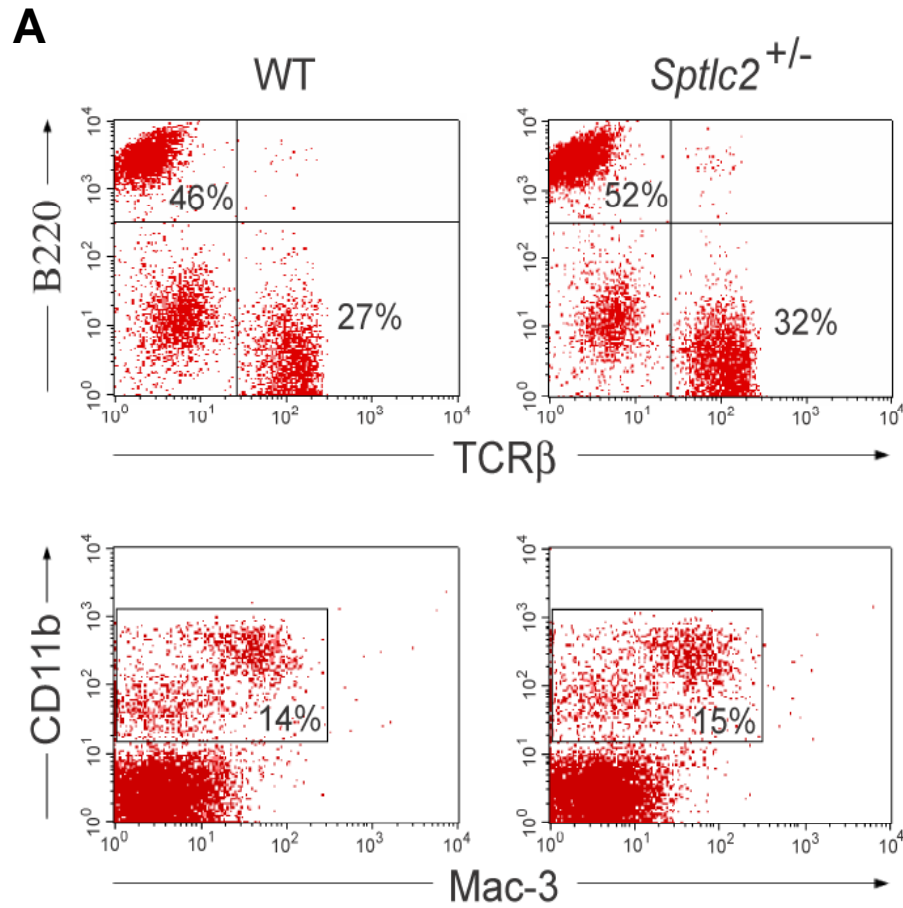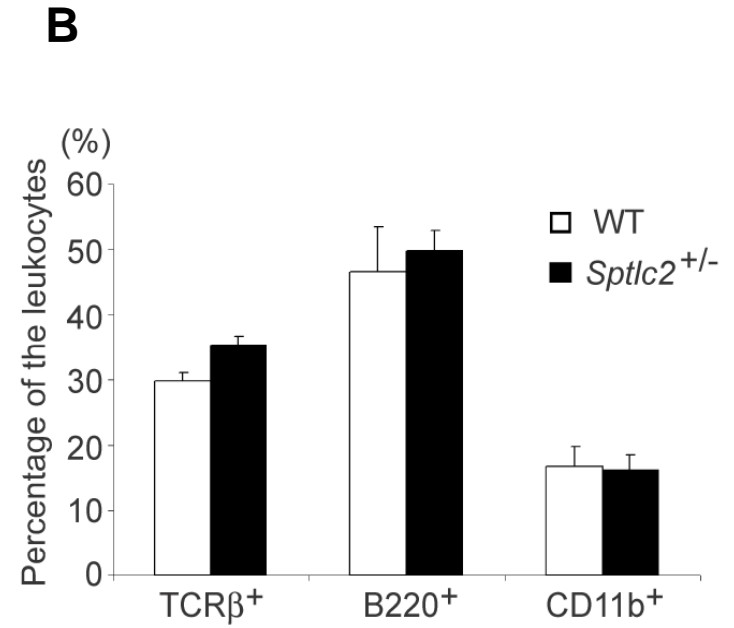

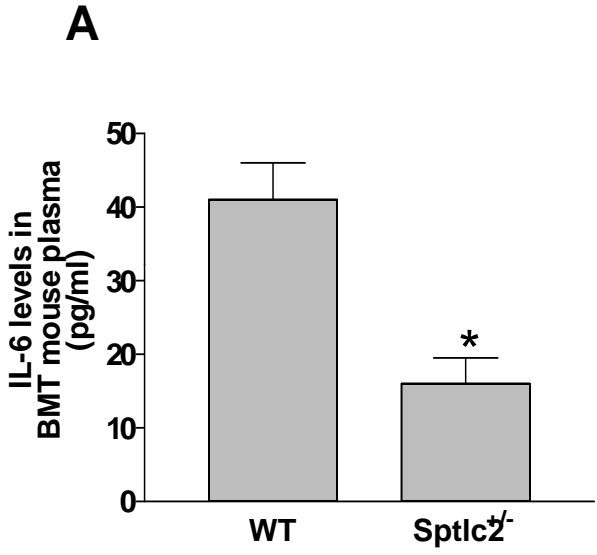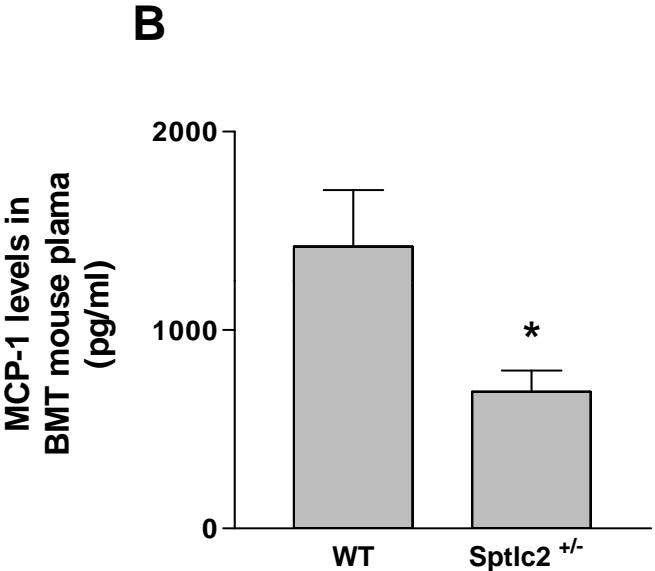

Supplemental Fig.7. Chakraborty et al.

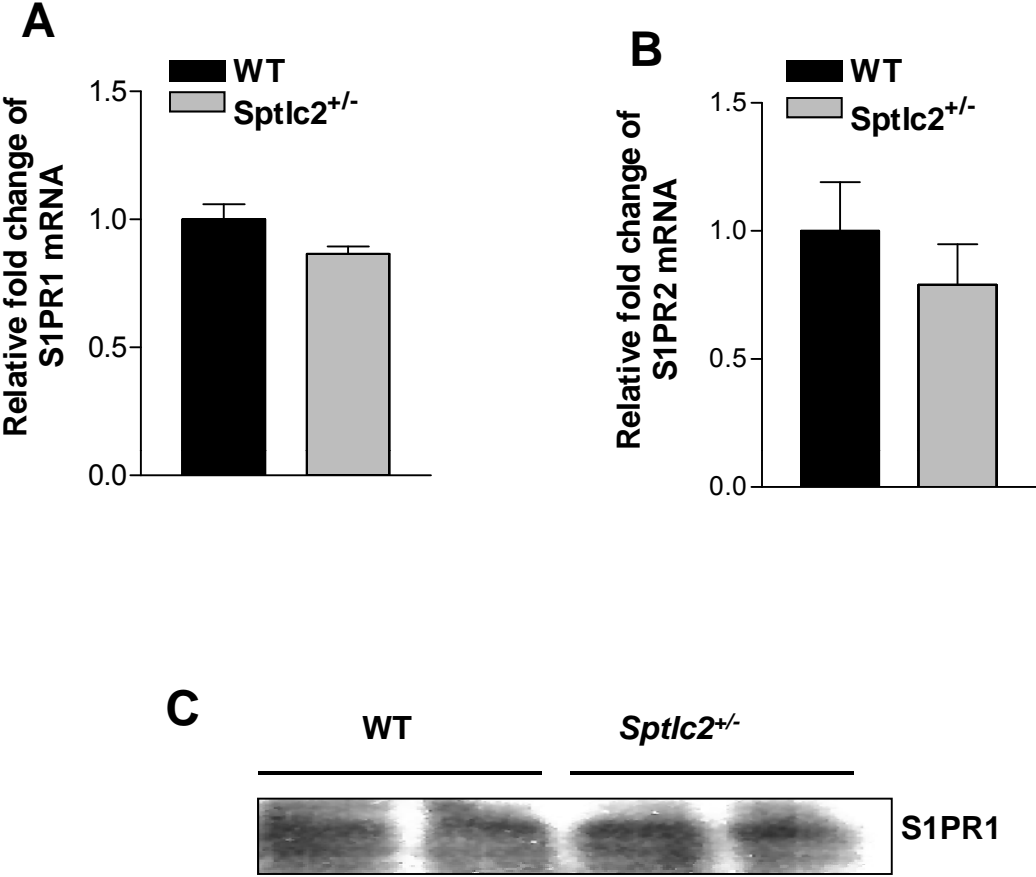

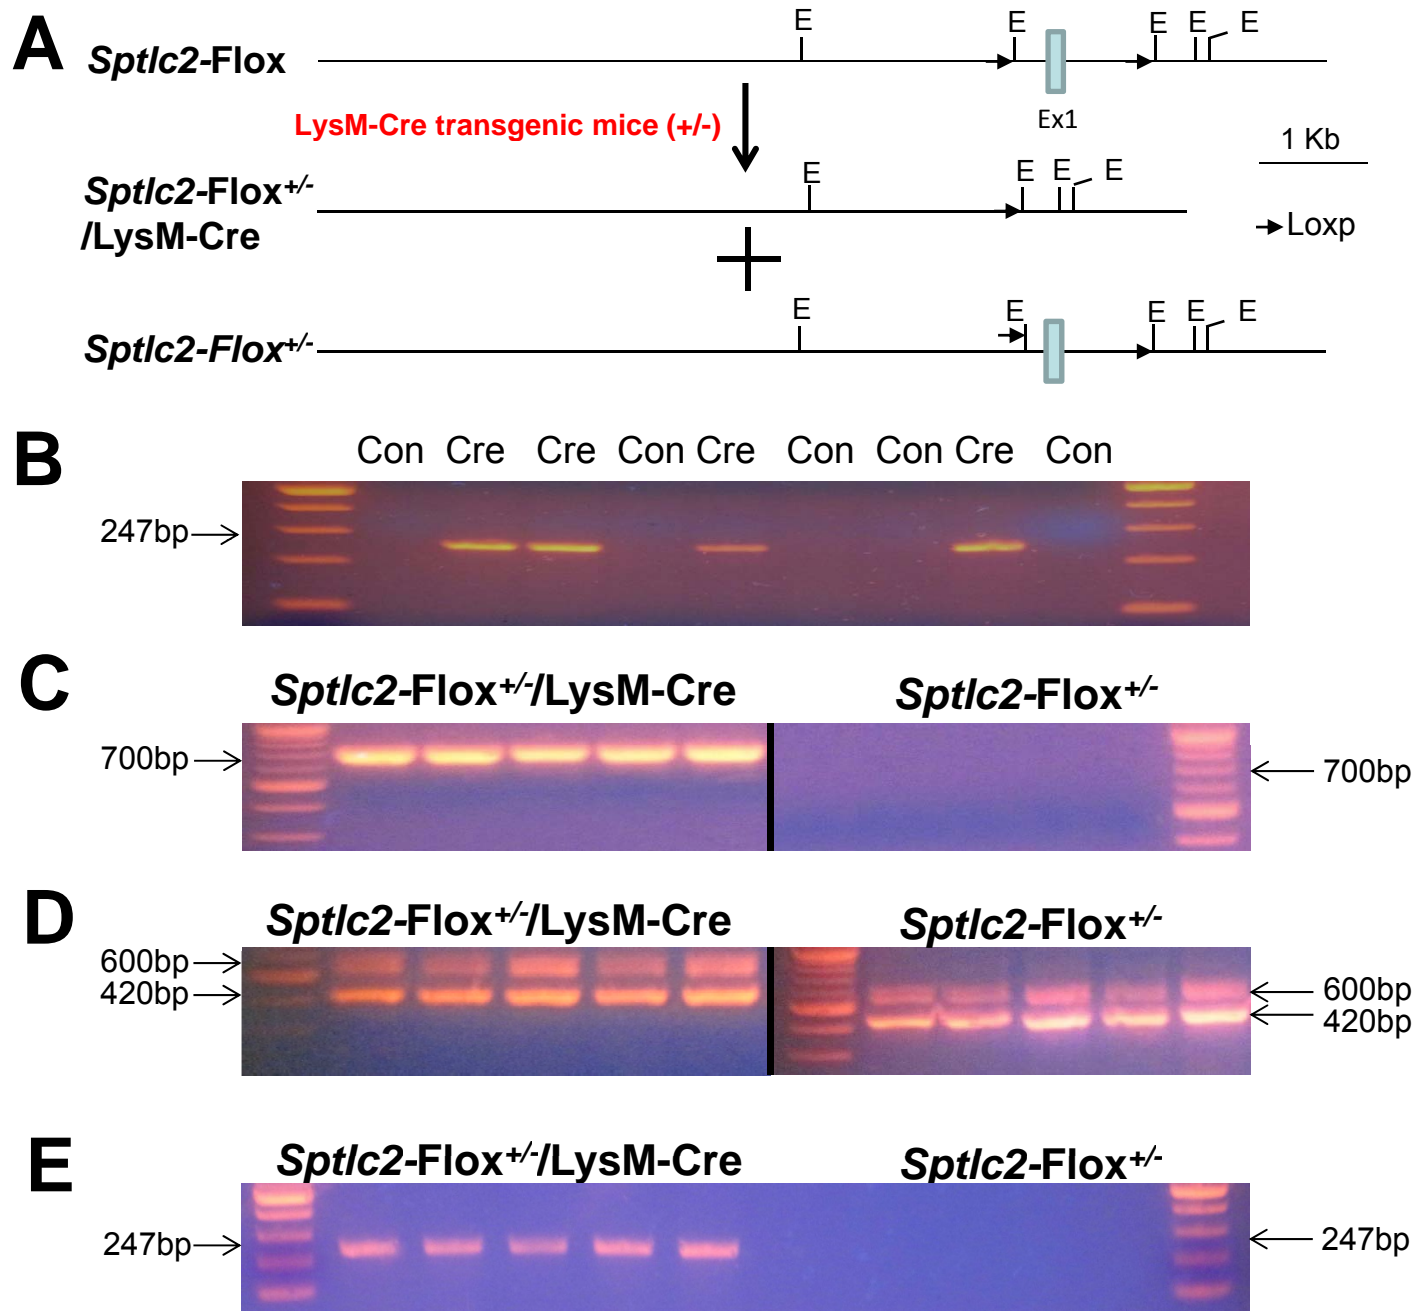



**Intracellular Sphingolipid concentrations of WT and *Sptlc2*<sup>+/-</sup> macrophages.**

|                                    | <b>SM</b>                    | <b>PC</b> | <b>Cer</b> | <b>DAG</b> | <b>SO</b> | <b>S-1-P</b> |
|------------------------------------|------------------------------|-----------|------------|------------|-----------|--------------|
|                                    | ------(nmol/mg protein)----- |           |            |            |           |              |
| <b>WT</b>                          | 45±5                         | 82±7      | 1.7±0.2    | 2.1±0.3    | 0.05±0.01 | 0.29±0.02    |
| <b><i>Sptlc2</i><sup>+/-</sup></b> | 33±3*                        | 79±10     | 1.5±0.3    | 1.9±0.4    | 0.03±0.01 | 0.34±0.03    |

Value are mean ± SD, Bone marrow macrophages derived from n=5 mice. \*p<0.05.

SM, sphingomyelin; PC, phosphatidylcholine; Cer, ceramide; DAG, diacylglycerol; SO, Sphingosine; S-1-P, Sphingosine-1-phosphate.

**Plasma lipid measurements of WT  $\rightarrow$  *Ldlr*<sup>-/-</sup> and *Sptlc2*<sup>+/-</sup>  $\rightarrow$  *Ldlr*<sup>-/-</sup>  
bone marrow transplanted mice.**

---

|                                                                                       | <b>Total cholesterol</b> | <b>Triglycerides</b> | <b>Phospholipids</b> | <b>Sphingomyelin</b> |
|---------------------------------------------------------------------------------------|--------------------------|----------------------|----------------------|----------------------|
|                                                                                       | ------(mg/dL)-----       |                      |                      |                      |
| <b>WT <math>\rightarrow</math> <i>Ldlr</i><sup>-/-</sup></b>                          | 1613 $\pm$ 183           | 254 $\pm$ 49         | 970 $\pm$ 169        | 94 $\pm$ 14          |
| <b><i>Sptlc2</i><sup>+/-</sup> <math>\rightarrow</math> <i>Ldlr</i><sup>-/-</sup></b> | 1603 $\pm$ 242           | 236 $\pm$ 48         | 827 $\pm$ 141        | 81 $\pm$ 12          |

---

Values are Mean  $\pm$  SD, Plasma derived from n=9 mice put on Western diet for 12 weeks.

**Plasma sphingolipid concentrations of WT  $\rightarrow$  *Ldlr*<sup>-/-</sup> and *Sptlc2*<sup>+/-</sup>  $\rightarrow$  *Ldlr*<sup>-/-</sup> bone marrow transplanted mice.**

|                              | <b>SM</b><br>(mmol/L) | <b>Cer</b><br>( $\mu$ mol/L) | <b>SO</b><br>( $\mu$ mol/L) | <b>S-1-P</b><br>( $\mu$ mol/L) |
|------------------------------|-----------------------|------------------------------|-----------------------------|--------------------------------|
| WT                           | 3.7 $\pm$ 0.1         | 173 $\pm$ 37                 | 1 $\pm$ 0.2                 | 22 $\pm$ 3                     |
| <i>Sptlc2</i> <sup>+/-</sup> | 3.4 $\pm$ 0.1         | 155 $\pm$ 20                 | 0.9 $\pm$ 0.2               | 24 $\pm$ 3                     |

SM, sphingomyelin; Cer, ceramide; SO, Sphingosine; S-1-P, Sphingosine-1-phosphate.

Value are Mean  $\pm$  SD. Plasma derived from n=5 mice put on Western diet for 12 weeks.

**Blood cell counts in WT and *Sptlc2*<sup>+/-</sup> donor mice**

| Mice                     | WT                    | <i>Sptlc2</i> <sup>+/-</sup> |
|--------------------------|-----------------------|------------------------------|
| Red Blood Cells (M/ul)   | 6.2 <sub>±</sub> 0.7  | 5.7 <sub>±</sub> 0.5         |
| White Blood Cells (K/ul) | 9.2 <sub>±</sub> 2.1  | 9.0 <sub>±</sub> 1.5         |
| Hemoglobin (g/dl)        | 17.3 <sub>±</sub> 2.2 | 18.8 <sub>±</sub> 2.8        |
| Platelets (K/ul)         | 963 <sub>±</sub> 41   | 896 <sub>±</sub> 65          |
| Neutrophils (K/ul)       | 3.3 <sub>±</sub> 0.10 | 3.5 <sub>±</sub> 0.1         |
| Eosinophils (K/ul)       | 0.6 <sub>±</sub> 0.07 | 0.7 <sub>±</sub> 0.15        |
| Basophils (K/ul)         | 0.2 <sub>±</sub> 0.1  | 0.2 <sub>±</sub> 0.1         |
| Monocytes (K/ul)         | 1.4 <sub>±</sub> 0.6  | 1.3 <sub>±</sub> 0.4         |
| Lymphocytes (K/ul)       | 8.8 <sub>±</sub> 1.8  | 8.5 <sub>±</sub> 0.6         |

Values are mean<sub>±</sub>SD, n=5. M, million; K, thousand.

**Blood cell counts in WT → *Ldlr*<sup>-/-</sup> and *Sptlc2*<sup>+/-</sup> → *Ldlr*<sup>-/-</sup>  
bone marrow transplanted mice**

| Mice                     | WT → <i>Ldlr</i> <sup>-/-</sup> | <i>Sptlc2</i> <sup>+/-</sup> → <i>Ldlr</i> <sup>-/-</sup> |
|--------------------------|---------------------------------|-----------------------------------------------------------|
| Red Blood Cells (M/ul)   | 4.6±0.4                         | 4.4±0.1                                                   |
| White Blood Cells (K/ul) | 6±1.2                           | 5.2±0.7                                                   |
| Hemoglobin (g/dl)        | 16.6±0.6                        | 16.5±0.2                                                  |
| Platelets (K/ul)         | 216±78                          | 193±29                                                    |
| Neutrophils (K/ul)       | 2.6±0.3                         | 2.2±0.2                                                   |
| Eosinophils (K/ul)       | 0.9±0.2                         | 0.8±0.3                                                   |
| Basophils (K/ul)         | 0.2±0.1                         | 0.1±0.1                                                   |
| Monocytes (K/ul)         | 1.5±0.2                         | 1.3±0.2                                                   |
| Lymphocytes (K/ul)       | 4.2±0.9                         | 3.4±0.7                                                   |

Values are Mean±SD. M, million; K, thousand.

Blood collected from n=5 mice put on Western diet for 12 weeks.

**Blood cell counts in *Sptlc2-Flox<sup>+/-</sup>* → *Ldlr<sup>-/-</sup>* and *Sptlc2-Flox<sup>+/-</sup>* /*LysM-Cre* → *Ldlr<sup>-/-</sup>*  
bone marrow transplanted mice**

| Mice                     | <i>Sptlc2-Flox<sup>+/-</sup></i> → <i>Ldlr<sup>-/-</sup></i> | <i>Sptlc2-Flox<sup>+/-</sup></i> / <i>LysM-Cre</i> → <i>Ldlr<sup>-/-</sup></i> |
|--------------------------|--------------------------------------------------------------|--------------------------------------------------------------------------------|
| Red Blood Cells (M/ul)   | 8.1±0.2                                                      | 8.5±0.1                                                                        |
| White Blood Cells (K/ul) | 8.2±2.1                                                      | 6.5±0.6                                                                        |
| Hemoglobin (g/dl)        | 12.6±0.2                                                     | 12.9±0.3                                                                       |
| Platelets (K/ul)         | 497±169                                                      | 488±90                                                                         |
| Neutrophils (K/ul)       | 4.1±0.5                                                      | 4.5±0.7                                                                        |
| Eosinophils (K/ul)       | 1.1±0.2                                                      | 1.0±0.3                                                                        |
| Basophils (K/ul)         | 0.6±0.5                                                      | 0.6±0.3                                                                        |
| Monocytes (K/ul)         | 1.8±0.2                                                      | 1.5±0.1                                                                        |
| Lymphocytes (K/ul)       | 5.3±1.4                                                      | 4.6±0.5                                                                        |

Values are Mean±SD. M, million; K, thousand.

Blood collected from n=5 mice put on Western diet for 12 weeks.
